# Supplementary material for: Hypotaurine evokes a malignant phenotype in glioma through aberrant hypoxic signaling
Source: PubMed Central journal article supplement (PMC4924780; doi:10.18632/oncotarget.7710), 2016-02-25
Supplement: oncotarget-07-15200-s001.pdf [file oncotarget-07-15200-s001.pdf]

## SUPPLEMENTARY MATERIALS AND METHODS

### Reagents

Homocysteic acid (HCA), cysteamine, hypotaurine, taurine were all purchased from Sigma-Aldrich (Shanghai, China).

### Cell culture

U251 cells were cultured in DMEM high glucose media with 10% fetal bovine serum at 36.5°C with 5% CO<sub>2</sub> in a fully humidified incubator. For growth property analysis, cells were seeded in 96-well plates with each well containing 200µl of ~10<sup>4</sup>/ml cells. After 24h, every 20µl of WST-1 (Roche Diagnostics, Indianapolis, IN) was added to each well and the mixture was incubated for another 3h in the above

mentioned environment. The plates were read by a BIO-RAD 550 ELISA reader (Hercules, CA) with the working wavelength of 450nm.

The cell line of 2-aminoethanethiol dioxygenase (ADO) gene stable knockout U251 ( $\Delta$ ADO) and its vector counterpart were purchased from 3DBiopharm (Shanghai, China). These cells were cultured at the presence of 0.5 µg/ml puromycin in DMEM high glucose media containing 10% fetal bovine serum.

Culture condition of U87MG cells was identical to that of the U251 cells.

### REFERENCE

1. Vitvitsky, V., Garg, S.K., & Banerjee, R. Taurine biosynthesis by neurons and astrocytes. *J. Biol. Chem.* 286, 32002-32010 (2011).

## SUPPLEMENTARY FIGURE AND TABLES

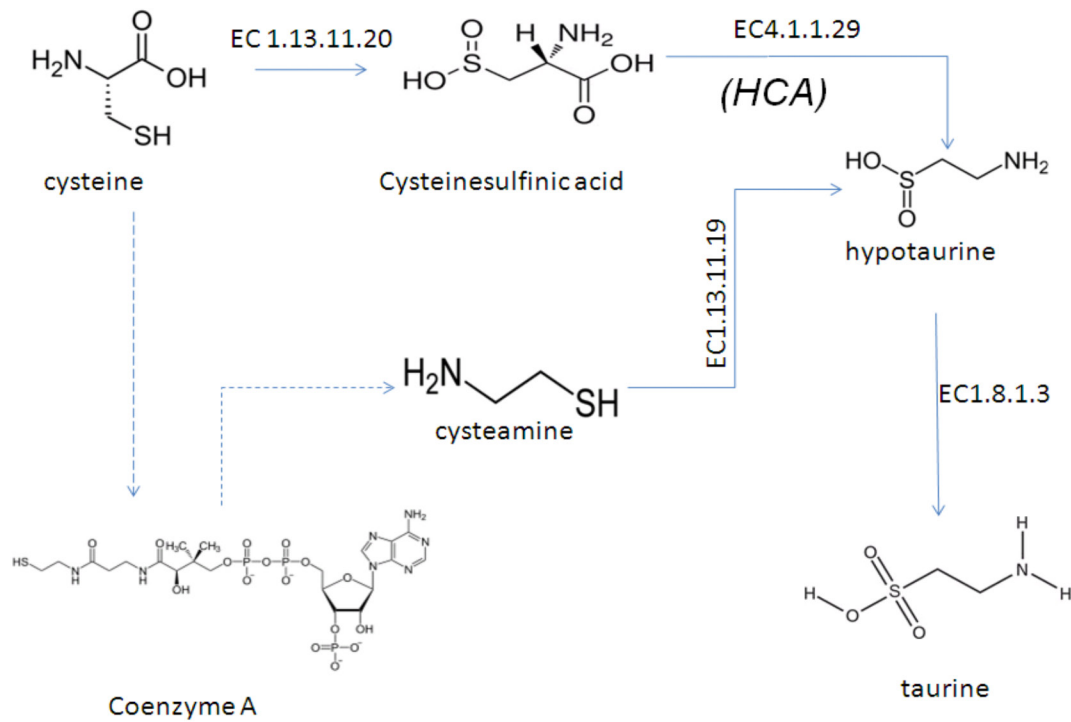Supplementary Figure S1: Schematic representation of hypotaurine biosynthesis pathways in the cell<sup>1</sup>.

Supplementary Table S1: Sample Information

| Tumor Type                                              | WHO grade | total |
|---------------------------------------------------------|-----------|-------|
| Tumor adjacent tissue from Grade II astrocytoma         | control   |       |
| Tumor adjacent tissue from Grade I glioma               | control   |       |
| Tumor adjacent tissue from Grade II astrocytoma         | control   |       |
| Tissue from aneurysm decompression operation            | control   |       |
| Tissue from aneurysm decompression operation            | control   |       |
| Tumor adjacent tissue from Grade IV glioblastoma        | control   |       |
| Tumor adjacent tissue from Grade II astrocytoma         | control   |       |
| Tumor adjacent tissue from Grade II astrocytoma         | control   |       |
| Tumor adjacent tissue from glioblastoma multiforme      | control   |       |
| Tumor adjacent tissue from Grade II astro-mesoglioma    | control   |       |
| Tumor adjacent tissue from Grade III astrocytoma        | control   |       |
| Tumor adjacent tissue from glioblastoma multiforme      | control   |       |
| Tumor adjacent tissue from Grade I - II astrocytoma     | control   |       |
| Tumor adjacent tissue from Grade III astrocytoma        | control   |       |
| Tumor adjacent tissue from anaplastic oligodendroglioma | control   |       |
| Tumor adjacent tissue from central neurocytoma          | control   |       |
| Tumor adjacent tissue from glioblastoma multiforme      | control   |       |
| Tumor adjacent tissue from Grade II - III glioma        | control   | 18    |
| Oligodendroglioma                                       | II        |       |
| Astro-oligodendroglioma                                 | II        |       |
| Oligodendroglioma                                       | II        |       |
| Astro-oligodendroglioma                                 | II        |       |
| Astro-oligodendroglioma                                 | II        |       |
| Astrocytoma                                             | II        |       |
| Astro-oligodendroglioma                                 | II        |       |
| Astro-oligodendroglioma                                 | II        |       |
| Astro-oligodendroglioma                                 | II        |       |
| Astro-oligodendroglioma                                 | II        |       |
| Glioma                                                  | II        | 11    |
| Anaplastic oligodendroglioma                            | III       |       |
| Anaplastic oligodendroglioma                            | III       |       |
| Glioma                                                  | III       |       |
| Glioma                                                  | III       |       |
| Glioma                                                  | III       |       |
| Glioma                                                  | III       |       |

(Continued)

| <b>Tumor Type</b>            | <b>WHO grade</b> | <b>total</b> |
|------------------------------|------------------|--------------|
| Glioma                       | III              |              |
| Glioma                       | III              |              |
| Glioma                       | III              |              |
| Anaplastic oligodendroglioma | III              | 10           |
| Glioblastoma multiforme      | IV               |              |
| Glioblastoma multiforme      | IV               |              |
| Glioblastoma multiforme      | IV               |              |
| Glioblastoma multiforme      | IV               |              |
| Glioblastoma multiforme      | IV               |              |
| Glioblastoma multiforme      | IV               |              |
| Glioblastoma multiforme      | IV               | 7            |

**Supplementary Table S2: Identified metabolites by CE-MS analysis**

(See Supplementary File 1)
